# Supplementary material for: Changes in profile of lipids and adipokines in patients with newly diagnosed hypothyroidism and hyperthyroidism
Source: PubMed Central journal article supplement (PMC4872157; doi:10.1038/srep26174), 2016-05-19
Supplement: srep26174-s1.pdf [file srep26174-s1.pdf]

**Changes in profile of lipids and adipokines in patients with newly diagnosed  
hypothyroidism and hyperthyroidism**

Yanyan Chen<sup>2</sup>, Xiafang Wu<sup>1</sup>, Ruirui Wu<sup>1</sup>, Xiance Sun<sup>3</sup>, Boyi Yang<sup>4</sup>, Yi Wang<sup>4\*</sup>  
and Yuanyuan Xu<sup>1\*</sup>

<sup>1</sup> Program of Environmental Toxicology, School of Public Health, China Medical University, Shenyang, Liaoning, P. R. China..

<sup>2</sup> Department of Geriatrics, the First Affiliated Hospital, China Medical University, Shenyang, Liaoning, P. R. China.

<sup>3</sup> Department of Occupational and Environmental Health, College of Public Health, Dalian Medical University, Dalian, Liaoning, P. R. China.

<sup>4</sup> Environment and Non-communicable Disease Research Center, School of Public Health, China Medical University, Shenyang, Liaoning, P. R. China.

Corresponding to Yuanyuan Xu and co-corresponding to Yi Wang

Address: No.77 Puhe Road, Shenyang North New Area, Shenyang, Liaoning Province, 110122, P. R. China.

\* Correspondence and request for materials should be addressed to Y.X. (email: [yyxu@mail.cmu.edu.cn](mailto:yyxu@mail.cmu.edu.cn)) or to Y.W. (email: [wangyi@mail.cmu.edu.cn](mailto:wangyi@mail.cmu.edu.cn)).

## Supplementary Information

Supplemental Table 1. The results of quadratic regression model between adipokines or HOMA-IR and FT4, FT3 or TSH in serum.

|             | FT4            |          | FT3            |          | TSH            |          |
|-------------|----------------|----------|----------------|----------|----------------|----------|
|             | R <sup>2</sup> | <i>p</i> | R <sup>2</sup> | <i>p</i> | R <sup>2</sup> | <i>p</i> |
| Resistin    | 0.120          | < 0.001  | 0.058          | <0.001   | <0.001         | 0.915    |
| Leptin      | 0.092          | < 0.001  | 0.055          | <0.001   | 0.208          | <0.001   |
| Adiponectin | 0.245          | < 0.001  | 0.023          | <0.001   | 0.004          | 0.240    |
| HOMA-IR     | 0.002          | 0.510    | 0.008          | 0.042    | 0.014          | 0.004    |
